JANUARY 2018 | VOLUME 69 | NUMBER 1

# Psychiatric Services

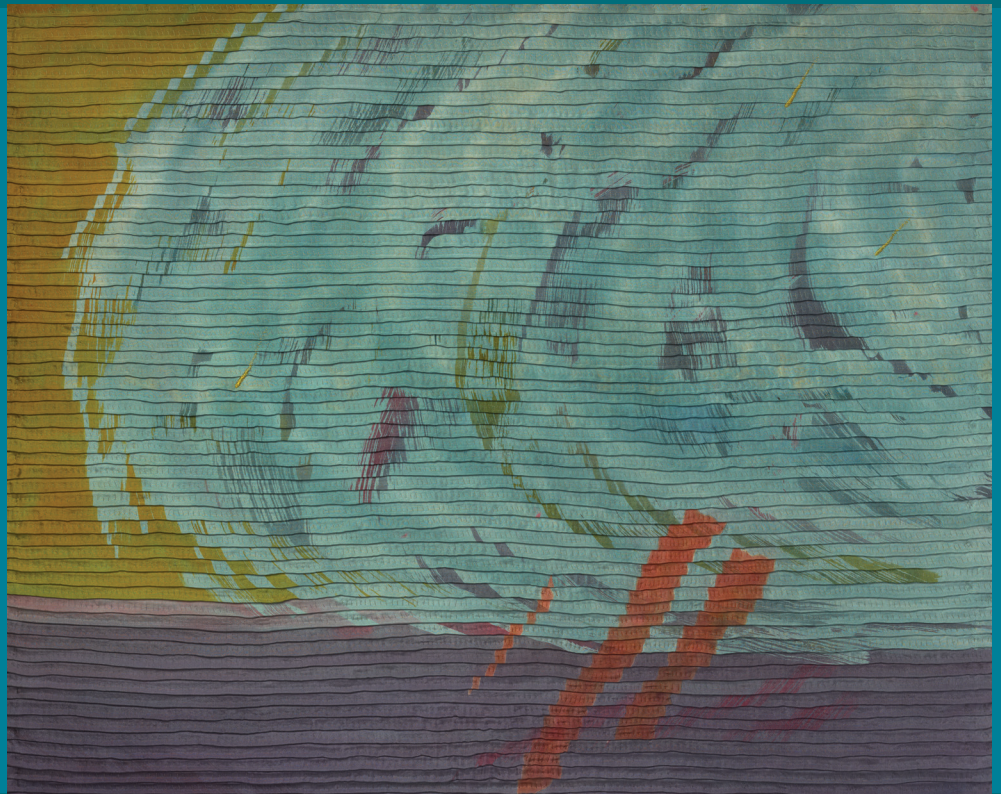

Effectiveness of mental health courts in reducing recidivism

Cost-effectiveness of interventions to reduce suicide risk

The opioid epidemic: strategies for policy makers

A mobile app for monitoring and managing depression in pregnancy

AMERICAN  
**PSYCHIATRIC**  
ASSOCIATION

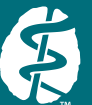

[ps.psychiatryonline.org](http://ps.psychiatryonline.org)
