# Psychiatric Research and Clinical Practice

Edited by Kimberly A. Yonkers, M.D.

An Open-Access Journal From the American Psychiatric Association

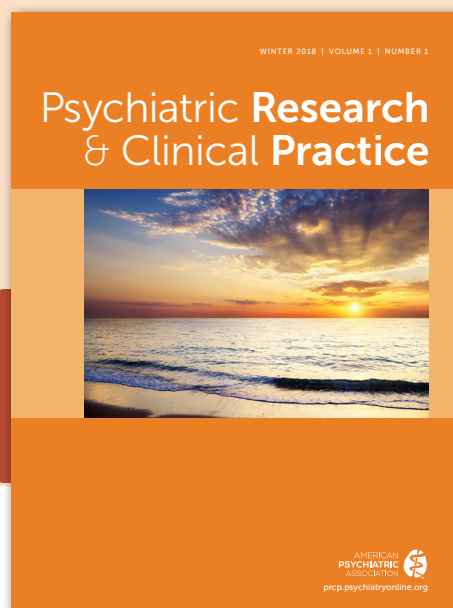

Psychiatric Research and Clinical Practice (PRCP) is a new peer-reviewed, open-access journal from the American Psychiatric Association that offers a high-profile publishing destination for peer-reviewed submissions that build upon the psychiatric knowledge base and bring research findings closer to clinical utility through deeper investigation.

Submissions on all aspects of mental and behavioral health to inform the field from bench to bedside are welcome. PRCP seeks to occupy that place between research and clinical utility, leaning toward clinical utility through publication of replication studies and features that show how new scientific knowledge can inform clinical practice. The journal will also feature “Clinical Pearls”—accounts by clinicians using the findings from the most up-to-date clinical research to help solve problems commonly confronted in clinical practice.

PRCP maintains the rigorous standards of APA’s scholarly publications while providing an essential resource for today’s practicing physicians. Published in accordance with open-access principles, PRCP makes all of its content immediately available for free—the reach one wants from an established and respected publisher.

Psychiatric Research and Clinical Practice is committed to keeping the field of psychiatry vibrant and relevant by publishing wide-ranging information on all aspects of mental and behavioral health and enhancing APA’s leadership role in scientific publishing in psychiatry by expanding the amount of research, clinical practice, and systems of care content available to the field.

## About the Editor

Kimberly A. Yonkers, M.D., is Professor of Psychiatry, Epidemiology, Obstetrics/Gynecology, and Reproductive Sciences and Director of the Center for Wellbeing of Women and Mothers at Yale University. She brings to the task of serving as PRCP’s Editor a broad and deep experience in research and clinical work. Her research includes investigations into the clinical course, etiopathology, and treatment of psychiatric disorders as they occur in women. A major component of this work includes investigations into the occurrence and treatment of illnesses in pregnancy and the postpartum period and across the menstrual cycle. This area, by its nature, cuts across disciplines and requires psychiatric expertise as well as knowledge in neuroscience and reproductive biology. Her work has also included determining optimal methods for screening and treating women for substance use problems when they are pregnant or postpartum.

AMERICAN  
PSYCHIATRIC  
ASSOCIATION  
PUBLISHING

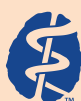

www.appi.org  
1-800-368-5777  
appi@psych.org

[prcp.psychiatryonline.org](http://prcp.psychiatryonline.org)
