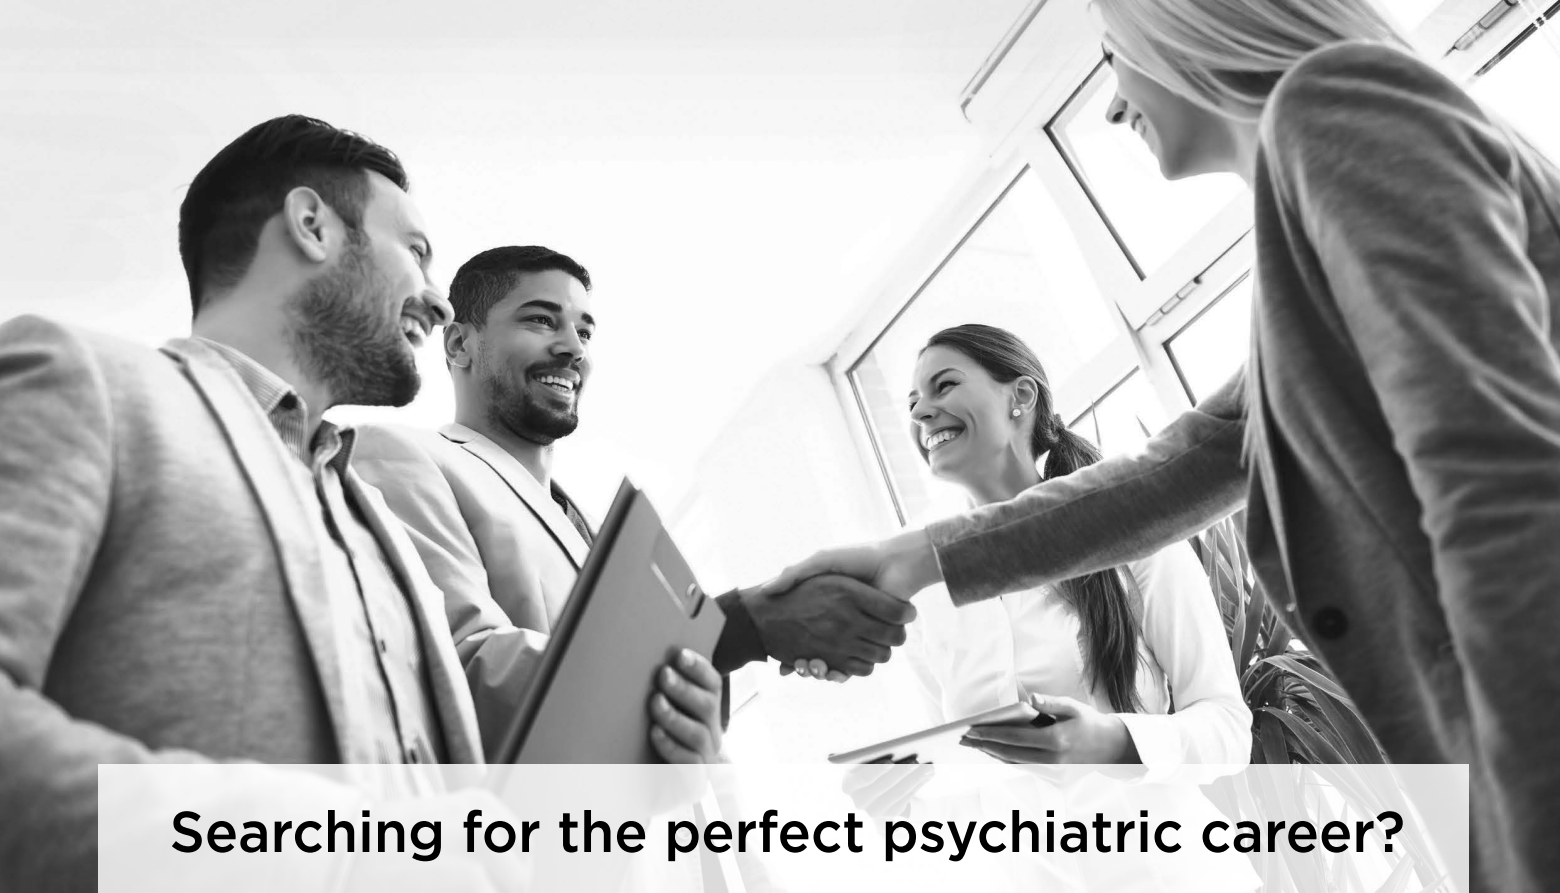

Searching for the perfect psychiatric career?

**Let APA JobCentral help!**

### Manage Your Career

- Browse hundreds of active job listings!
- Create an account to save jobs, store multiple resumes and cover letters and communicate with employers through our internal messaging system.
- Set up multiple job alerts specifying your skills, interests and location to receive e-mails when employers post jobs that match your criteria.

### Recruit for Open Positions

- Post your job in front of thousands of highly qualified psychiatrists.
- Cross promote your job listing in *Psychiatric News*.
- Search the anonymous resume database to find your ideal candidate.

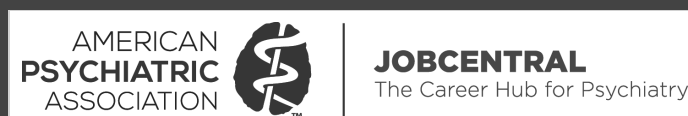

**jobs.psychiatry.org**

# New Titles on Integrated Care

Just Published!

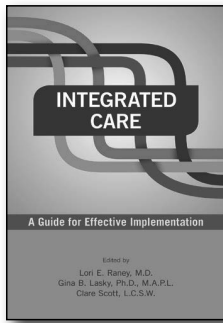

## *Integrated Care*

*A Guide for Effective Implementation*

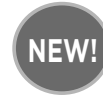

Edited by **Lori E. Raney, M.D., Gina B. Lasky, Ph.D., M.A.P.L., and Clare Scott, L.C.S.W.**

This book provides a detailed, thoughtful, and experience-based guide to the complex and potentially overwhelming process of implementing an integrated care program. The advantages of integrated care from both the clinical and administrative perspectives are many, including better detection of illness, improvement in overall health outcomes, a better

patient care experience, and flexibility in responding to policy and financial changes. The book addresses the emerging framework of core principles for effective integrated care, reviews the most up-to-date research on implementation, and presents practice-based experience to serve as a guide. This information is useful in both traditional integration of behavioral health into general medical settings or integrating general medical care into a specialty mental health or substance use treatment setting. Because administrators, clinicians, policy makers, payers and others need guidance in determining what effective implementation looks like, the authors offer a three-part examination of the key components of an implementation strategy and explore the elements essential for success.

2017 • 290 pages • ISBN 978-1-61537-054-2 • Paperback • \$59.00 • Item #37054

2017 • 290 pages • ISBN 978-1-61537-133-4 • eBook • \$47.00 • Item #37133

## *Study Guide to Preventive Medical Care in Psychiatry*

*A Case Approach*

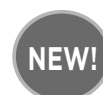

Edited by **Robert M. McCarron, D.O., Glen L. Xiong, M.D., Craig R. Keenan, M.D., Lorin M. Scher, M.D., Jaesu Han, M.D., and Mark E. Servis, M.D.**

*Study Guide to Preventive Medical Care in Psychiatry: A Case Approach* is an indispensable companion to *Preventive Medical Care in Psychiatry: A Practical Guide for Clinicians*. Like the primary text, the study guide was written by experts in the field and it reflects the text's focus on clinical care for psychiatrists and other mental health care providers who work in outpatient mental health and integrated clinics. Through the deft use of clinical cases, the study guide helps providers and trainees acquire the knowledge and skills necessary to view the patient holistically and improve outcomes.

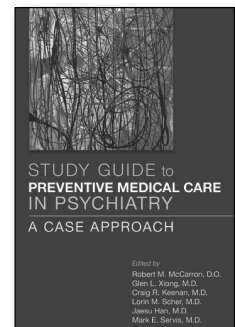

2017 • 313 pages • ISBN 978-1-61537-057-3 • Paperback • \$59.00 • Item #37057

2017 • 313 pages • ISBN 978-1-61537-116-7 • eBook • \$47.00 • Item #37116

Order Now

[www.appi.org](http://www.appi.org)

20% Discount for American Psychiatric Association Members  
25% Discount for APA Resident-Fellow Members

Please use Priority Code AH1737 when ordering.

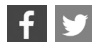

AMERICAN  
PSYCHIATRIC  
ASSOCIATION  
PUBLISHING

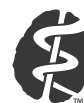

[www.appi.org](http://www.appi.org)

Email: [appi@psych.org](mailto:appi@psych.org)

Toll Free: 1-800-368-5777

# The DSM-5 Collection

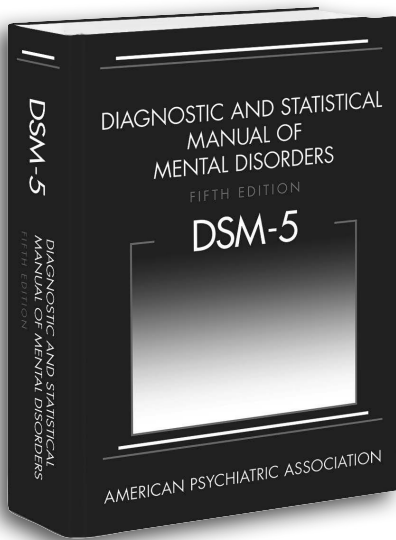

## Diagnostic and Statistical Manual of Mental Disorders, Fifth Edition (DSM-5®)

American Psychiatric Association

This new edition of *Diagnostic and Statistical Manual of Mental Disorders (DSM-5®)*, used by clinicians and researchers to diagnose and classify mental disorders, is the product of more than 10 years of effort by hundreds of international experts in all aspects of mental health. Their dedication and hard work have yielded an authoritative volume that defines and classifies mental disorders in order to improve diagnosis, treatment, and research.

The criteria are concise and explicit, intended to facilitate an objective assessment of symptom presentations in a variety of clinical settings—inpatient, outpatient, partial hospital, consultation-liaison, clinical, private practice, and primary care.

- The latest findings in neuroimaging and genetics have been integrated into each disorder along with gender and cultural considerations.
- The revised organizational structure recognizes symptoms that span multiple diagnostic categories, providing new clinical insights in diagnosis.

- Both ICD-9-CM and ICD-10-CM codes are included for each disorder.

The *Diagnostic and Statistical Manual of Mental Disorders, Fifth Edition*, is the most comprehensive, current, and critical resource for clinical practice available to today's mental health professionals.

2013 • 991 pages • ISBN 978-0-89042-554-1 • Hardcover • \$210.00 • Item #2554

2013 • 991 pages • ISBN 978-0-89042-555-8 • Paperback • \$160.00 • Item #2555

2013 • 991 pages • ISBN 978-0-89042-557-2 • eBook • \$128.00 • Item #2557

## DSM-5 COLLECTION

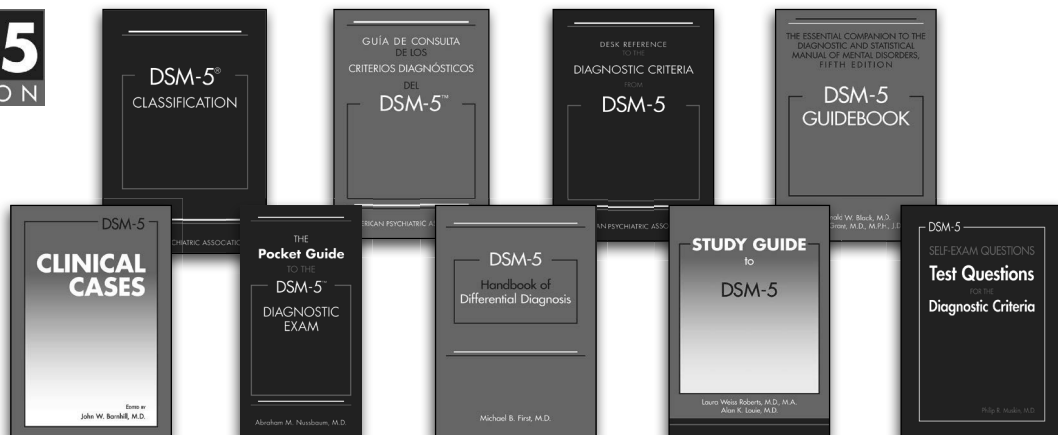

AMERICAN  
PSYCHIATRIC  
ASSOCIATION  
PUBLISHING

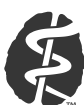

Order Online: [www.appi.org](http://www.appi.org)

Phone: 703-907-7322

Toll Free: 1-800-368-5777

Email: [appi@psych.org](mailto:appi@psych.org)

20% Discount for American Psychiatric Association Members

25% Discount for APA Resident-Fellow Members AH1706A

# Casebook of Neuropsychiatry

Edited by Trevor A. Hurwitz, M.B., Ch.B.,  
and Warren T. Lee, M.D., Ph.D.

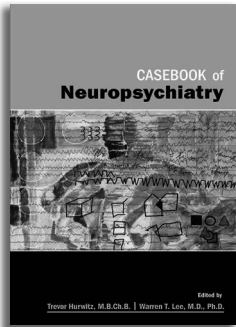

*Casebook of Neuropsychiatry* is comprised of 38 clinical cases based on real patient interactions that straddle the domains of neurology and psychiatry. The book is designed to supplement comprehensive texts by providing real-world accounts of patient presentations that clinicians are likely to encounter.

2013 • 383 pages • ISBN 978-1-58562-431-7 • Paperback  
\$83.00 • Item #62431

2013 • 383 pages • ISBN 978-1-58562-992-3 • eBook  
\$66.00 • Item #62992

AMERICAN  
PSYCHIATRIC  
ASSOCIATION  
PUBLISHING

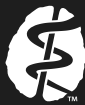

www.appi.org  
Email: appi@psych.org  
Phone: 1-800-368-5777

AH1732A

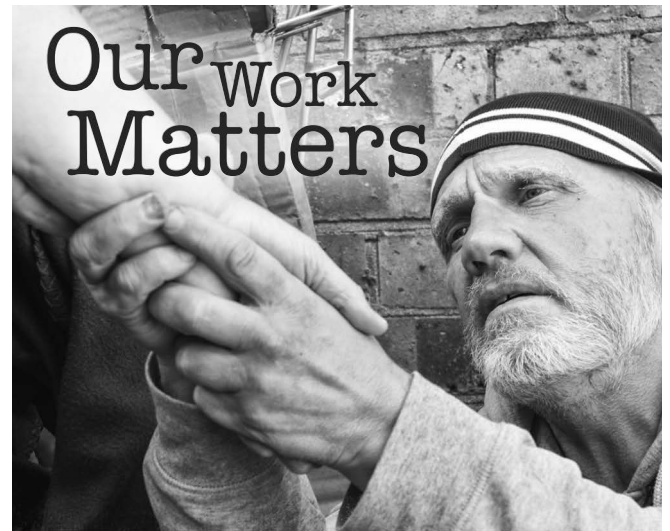

## Our Work Matters

Join us and make a difference for those who need it the most.

Los Angeles County Department of Mental Health is a nationally recognized leader providing a wide range of services to one of the largest populations in the country. We invite you to join our team as we help the most vulnerable in our community find a path to independence and personal recovery.

Competitive salary **starting at \$233,784/yr** with **benefits/potential bonuses** up to \$30,000/yr and **24hrs/wk** for outside employment.

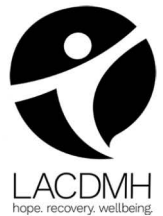

[www.psychiatristjobs.la](http://www.psychiatristjobs.la)

## FREE Online Subscription to *Psychiatric Services* for APA Resident-Fellow Members (RFMs)!

American Psychiatric Association Resident-Fellow Members (RFMs) can receive a free online subscription to *Psychiatric Services*.

Simply visit [ps.psychiatryonline.org](http://ps.psychiatryonline.org) for full-text access to all of the content of APA's highly ranked, reviewed monthly journal. *Psychiatric Services* focuses service delivery in organized systems of care, evolving best practices, and federal and state policies that affect the care people with mental illnesses.

**Please visit [ps.psychiatryonline.org](http://ps.psychiatryonline.org) and log in with your American Psychiatric Association username and password.**

Psychiatry residents who are not currently APA Resident-Fellow Members should consider membership in the American Psychiatric Association. The benefits provided to residents are an example of how the APA serves the needs of its members throughout their careers. The low introductory dues APA extends to RFMs are even waived for the first year. Please visit [www.psychiatry.org/join-apa](http://www.psychiatry.org/join-apa) for more information.

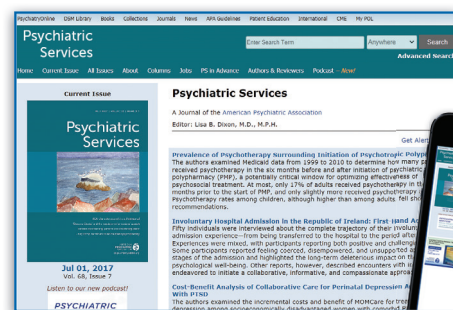

**NEW!**

Tune in to our monthly podcast.

**PSYCHIATRIC  
SERVICES  
FROM PAGES  
TO PRACTICE**

AMERICAN  
PSYCHIATRIC  
ASSOCIATION  
PUBLISHING

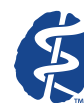

www.appi.org  
Email: appi@psych.org  
Toll-Free: 1-800-368-5777

AH1709A

# The American Psychiatric Association Publishing Textbook of Forensic Psychiatry, Third Edition

Edited by Liza H. Gold, M.D., and Richard L. Frierson, M.D.

JUST PUBLISHED!

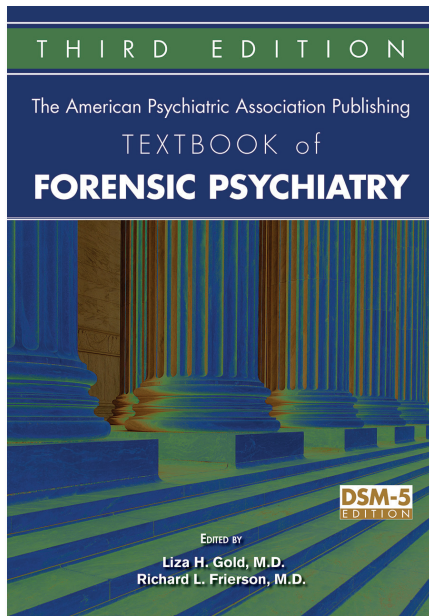

The new, third edition of *The American Psychiatric Association Publishing Textbook of Forensic Psychiatry*, now under the insightful leadership of Drs. Gold and Frierson, has undergone a major expansion and a comprehensive revision that reestablish it as the preeminent text in the field. No fewer than 10 new chapters have been added, and the entire book has been restructured to reflect the American Board of Psychiatry and Neurology's Content Outline for the Certification Examination in Forensic Psychiatry, thus facilitating its use in preparing for certification or maintaining certification.

In addition, the book constitutes a useful reference for general psychiatrists and psychologists interested in the legal issues that may impact clinical practice. The emphasis on Landmark Cases—as

fascinating as they are illuminating of critically important topics in case law—is highlighted in this edition, fostering understanding of the evolution of legal principles on the general practice of psychiatry and in the subspecialty of forensic psychiatry.

Written by some of the foremost experts in the field and structured for optimal utility, *The American Psychiatric Association Publishing Textbook of Forensic Psychiatry* will play an indispensable role both in educating forensic psychiatry fellows and general psychiatry residents and in keeping experienced clinicians up-to-date.

2018 • 568 pages • ISBN 978-1-61537-067-2 • Hardcover • \$145.00 • Item #37067

2018 • 568 pages • ISBN 978-1-61537-146-4 • eBook • \$116.00 • Item #37146

AMERICAN  
PSYCHIATRIC  
ASSOCIATION  
PUBLISHING

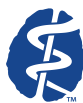

[www.appi.org](http://www.appi.org)

Email: [appi@psych.org](mailto:appi@psych.org)

Toll Free: 1-800-368-5777

20% Discount for American Psychiatric Association Members  
25% Discount for APA Resident-Fellow Members

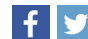

Priority Code AH1743
